# Supplementary material for: Multi-functional DNA-conjugated nanohydrogels for aptamer-directed breast cancer cell targeting
Source: Royal Society of Chemistry journal article supplement (doi:10.1039/d1nj04152e), 2021-01-01
Supplement: d1nj04152e1.pdf [file d1nj04152e1.pdf]

## Supporting Information

### **Multi-functional DNA-conjugated nanohydrogels for aptamer-directed breast cancer cell targeting**

Gangfeng Jiang,<sup>a,c,‡</sup> Nannan Wang,<sup>b,c,‡</sup> Lina Jia,<sup>b,c,‡</sup> Hongli Che,<sup>a,c</sup> Lihui Wang,<sup>b,c</sup> Jingyu Yang,<sup>b,c</sup> Hui Xu,<sup>d</sup> Chunfu Wu<sup>\*b,c</sup> and Mingzhe Liu<sup>\*a,c</sup>

<sup>a</sup> Department of Organic Chemistry, Shenyang Pharmaceutical University, Shenyang 110016, China; Key Laboratory of Structure-Based Drugs Design & Discovery (Shenyang Pharmaceutical University) of Ministry of Education, Shenyang 110016, China. E-mail: mzliu@syphu.edu.cn. (M.L.).

<sup>b</sup> Department of Pharmacology, Shenyang Pharmaceutical University, Shenyang 110016, China. E-mail: wucf@syphu.edu.cn. (C.W.).

<sup>c</sup> Benxi Institute of Pharmaceutical Research, Shenyang Pharmaceutical University, Benxi, 117004, China

<sup>d</sup> School of Pharmacy, Shenyang Pharmaceutical University, Shenyang 110016, China

\*Corresponding author

E-mail: mzliu@syphu.edu.cn

E-mail: [wucf@syphu.edu.cn](mailto:wucf@syphu.edu.cn)

‡ Contributed equally.

## 1. Synthesis of acrydite and Acrydite-DNA

The acrydite was synthesized according to previous report (Scheme S1)<sup>1</sup>. 6-amino-1-hexanol (0.5 g, 4.3 mmol) was cooled at 0 °C in dichloromethane, Triethylamine (1.2 mL, 8.6 mmol) was added to the solution, and methacryloyl chloride (1.35 g, 12.7 mmol) was added dropwise, the reaction solution was then stirred at 0 °C for 2 hours. After concentrated of the mixture, the mixture was poured into 5 mL ethanol and 15 % sodium hydroxide (2 mL) for 1 h. After evaporation of all solvents, the residue was added dichloromethane (10 mL) and washed with sodium hydrogen carbonate solution (10 mL, 5 mL×2) and sodium chloride (10 mL, 5 mL×2). The resulting material was chromatographed on a silica gel using ethyl acetate to afford 6-hydroxyhexyl methacrylamide (0.64 g, 80 % yield). A solution 6-hydroxyhexyl methacrylamide (0.50 g, 2.70 mmol) in anhydrous CH<sub>2</sub>Cl<sub>2</sub> (10 mL) was added slowly N,N'-Diisopropylethylamine (DIPEA) (0.98 g, 7.50 mmol). Then, 2-cyanoethyl diisopropyl chlorophosphoramidite (0.87 mL, 3.25 mmol) was added dropwise to the reaction solution and the mixture was stirred at 0 °C for 2 h. After removing the solvent, the residue was added dichloromethane (10 mL) and washed with sodium hydrogen carbonate solution (10 mL, 5 mL×2) and sodium chloride (10 mL, 5 mL×2) and dried with MgSO<sub>4</sub>. The residue was chromatographed on a silica gel using a 40:60:3 ethyl acetate-hexane-triethylamine and dried to afford acrydite (0.62 g, 60 % yield) as colorless oil. The final product was coupled with DNA to obtain acrydite-DNA by DNA synthesizer. Acrydite: <sup>1</sup>H NMR (400 MHz, CDCl<sub>3</sub>): δ 5.85 (s, 1H), 5.67 (s, 1H), 5.30 (s, 1H), 3.80-3.75 (m, 2H), 3.70-3.50 (m, 4H), 3.35-3.25 (m, 2H), 2.65 (t, 2H), 1.95 (s, 3H), 1.68-1.52 (m, 4H) 1.47-1.30 (m, 4H) 1.22-1.15 (m, 12H); ESI-MS, (m/z): 384.9 [M-H]<sup>-</sup>, Molecular weight of Acrydite-DNA was determined by Sangon Biotech, Shanghai, China (Fig. S1).

**Table S1** Sequences of the synthesized DNA.

| Name         | DNA sequences                                                        |
|--------------|----------------------------------------------------------------------|
| Acrydite-DNA | 5'-Acrydite-d (AAA AAA AAA AAA AAA AA)-3'                            |
| MUC1-aptamer | 5'-GCA GTT GAT CCT TTG GAT ACC CTG GTT TTT TTT TTT TTT TTT TTT TT-3' |
| T-DNA        | 5'-TTT TTT TTT TTT TTT TTT TT-3'                                     |

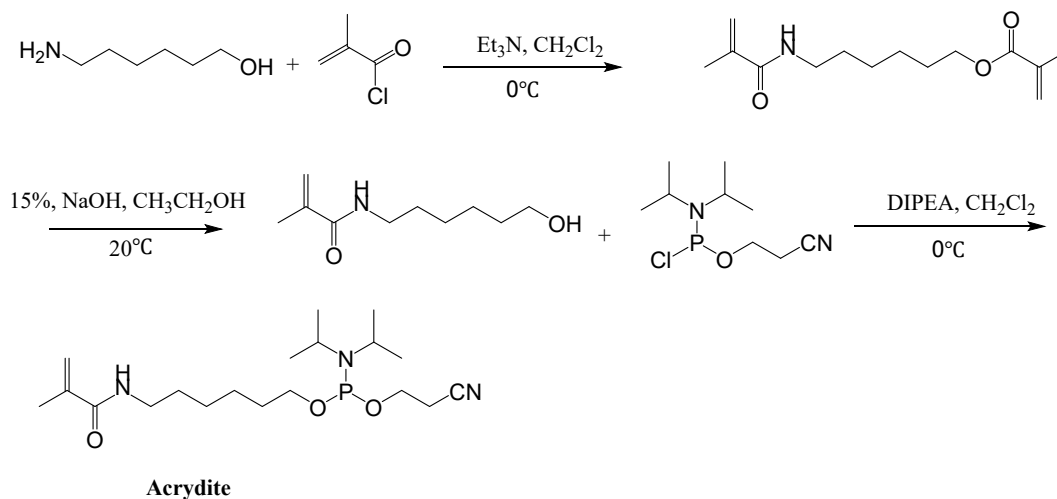

**Scheme S1** Synthetic route of acrydite

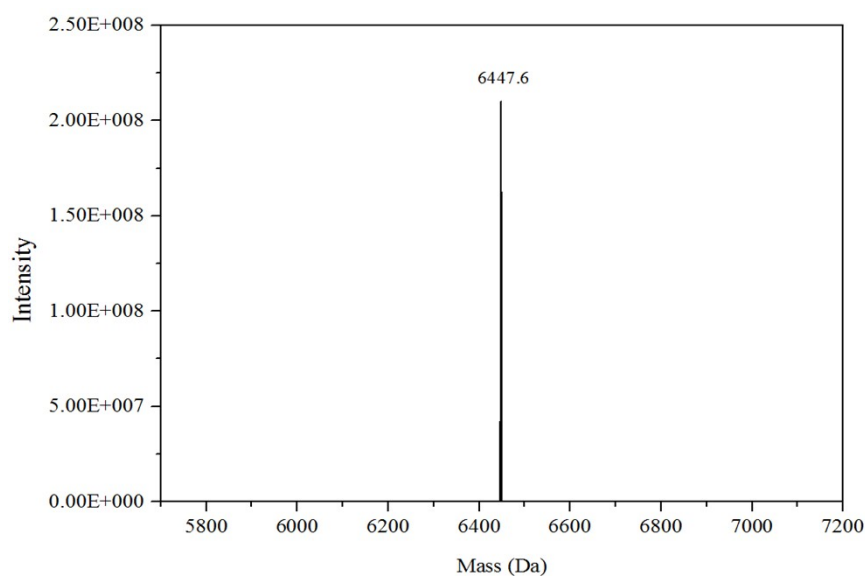

**Fig. S1** Mass spectrum of acrydite-DNA

## 2. Swelling behaviour of DNA-conjugated nanohydrogels

Swelling tests were conducted with freeze-dried DNA-conjugated nanohydrogels by immersing it in ultrapure water.<sup>2</sup> The concentration of gel-solution was 1 mg/mL. At predetermined time intervals, the sample was centrifuged followed by removing the supernatant. the precipitate was wiped with a filter paper to remove the surface water, and then weighted. The swelling ratio (SR) was calculated by the following equation:

$$SR=(W_t-W_0)/W_0$$

where  $W_0$  is the initial weight of dried nanohydrogels,  $W_t$  is the weight of nanohydrogel at time  $t$  after immersing in ultrapure water. Three samples were tested for each group.

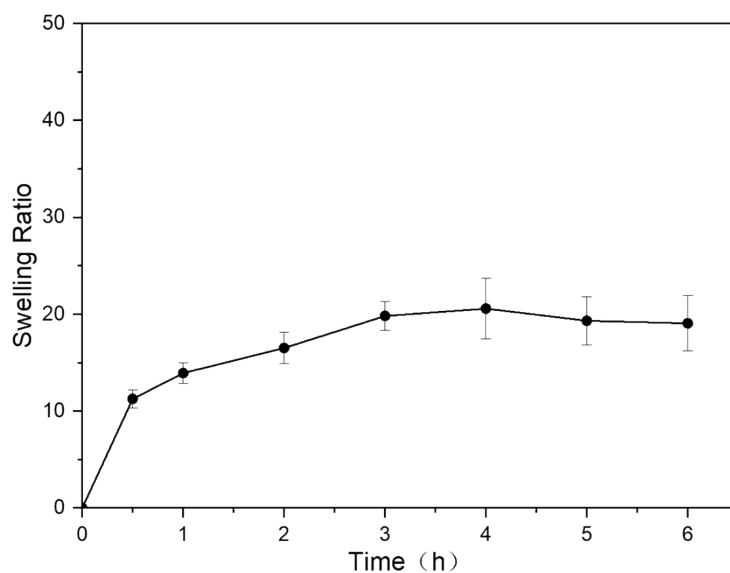

**Fig. S2** Swelling behavior of DNA-conjugated nanohydrogels in water.

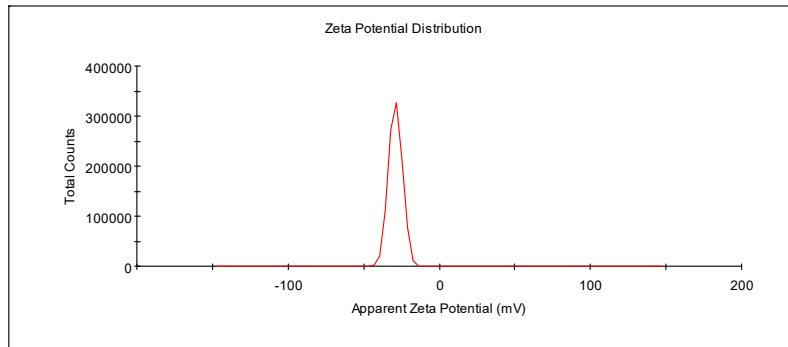

**Fig. S3** Z-potential chart of DNA-conjugated nanohydrogels.

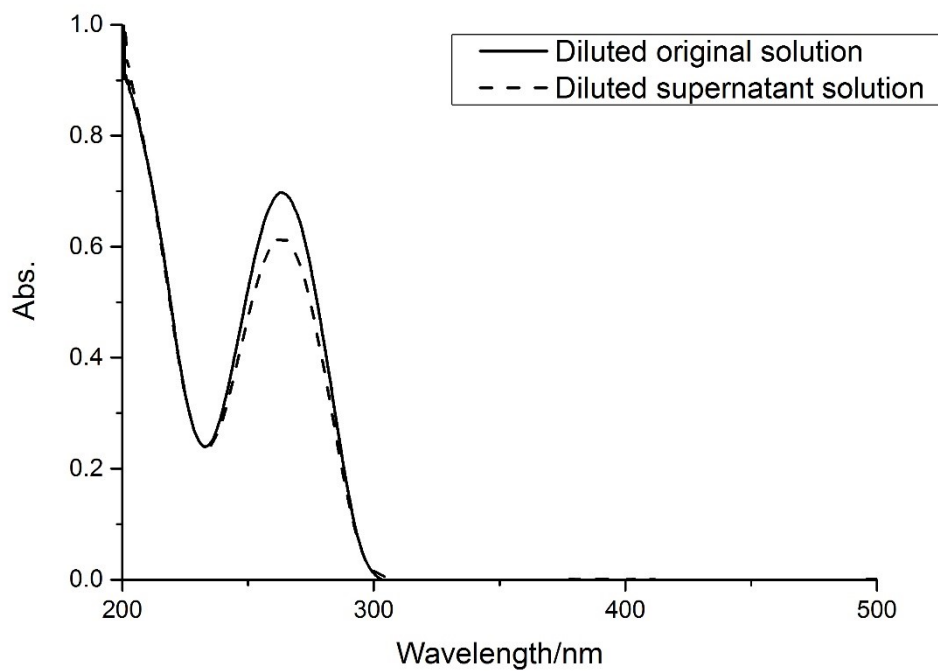

**Fig. S4** UV-visible spectra of diluted original MUC-1 aptamer solution (solid line) and diluted supernatant solution (dashed line) containing unbound MUC-1 aptamers.

**Table S2** Drug loading capacity and efficiency of Dox in DNA-conjugated nanohydrogels.

| Sample code | DNA-conjugated nanohydrogels (mg) | Dox (mg) | DLC (wt%) | DLE (wt%) |
|-------------|-----------------------------------|----------|-----------|-----------|
| 1           | 10                                | 2        | 15.8      | 95.1      |
| 2           | 10                                | 4        | 26.85     | 91.8      |
| 3           | 10                                | 6        | 35.76     | 88.4      |
| 4           | 10                                | 8        | 39.7      | 82.3      |
| 5           | 10                                | 10       | 42.9      | 75.5      |

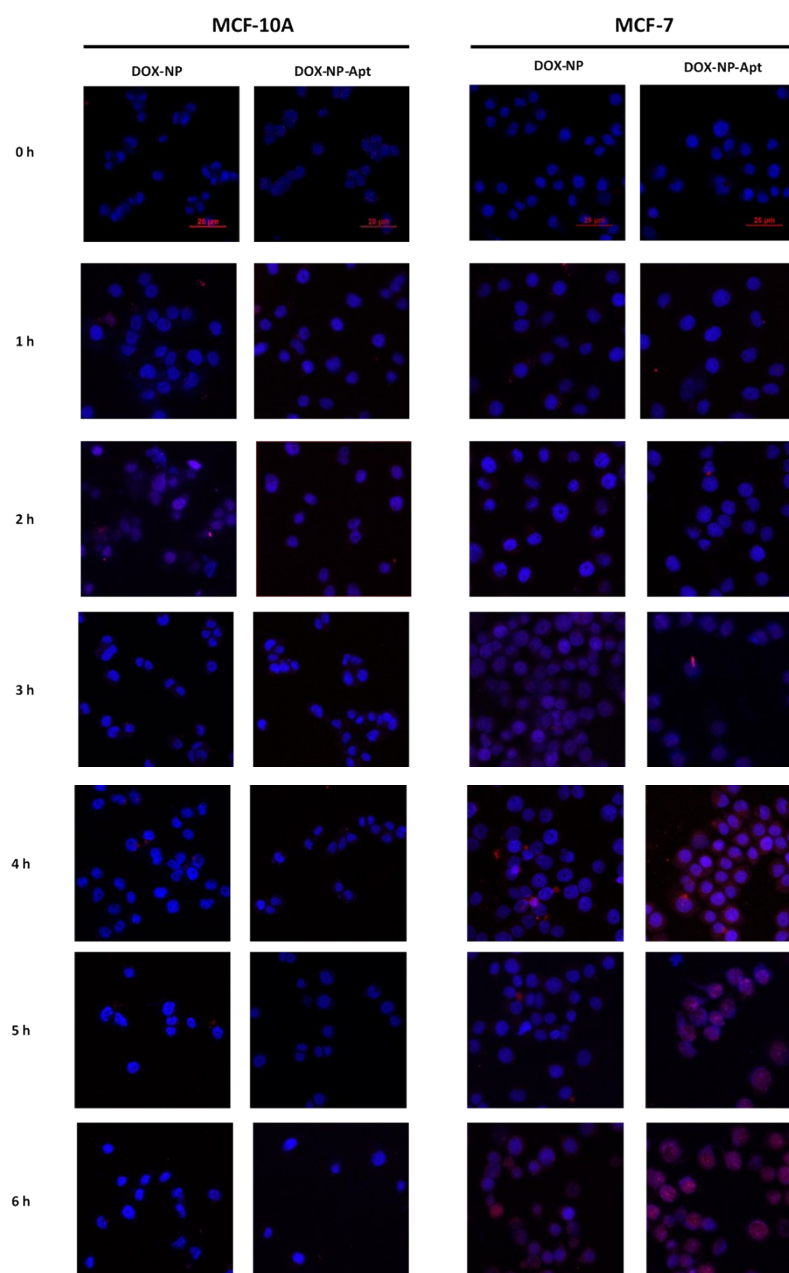

**Fig. S5** Representative confocal images of the uptake of MCF-7 and MCF-10A cells treated with Dox-loaded nanohydrogel particles (Dox-NP) or aptamer-functionalized Dox-NP (Dox-NP-Apt) at different times. MCF-7 and MCF-10A cells were treated with Dox-NP or Dox-NP-Apt. The photographs were analyzed at 600× magnification.

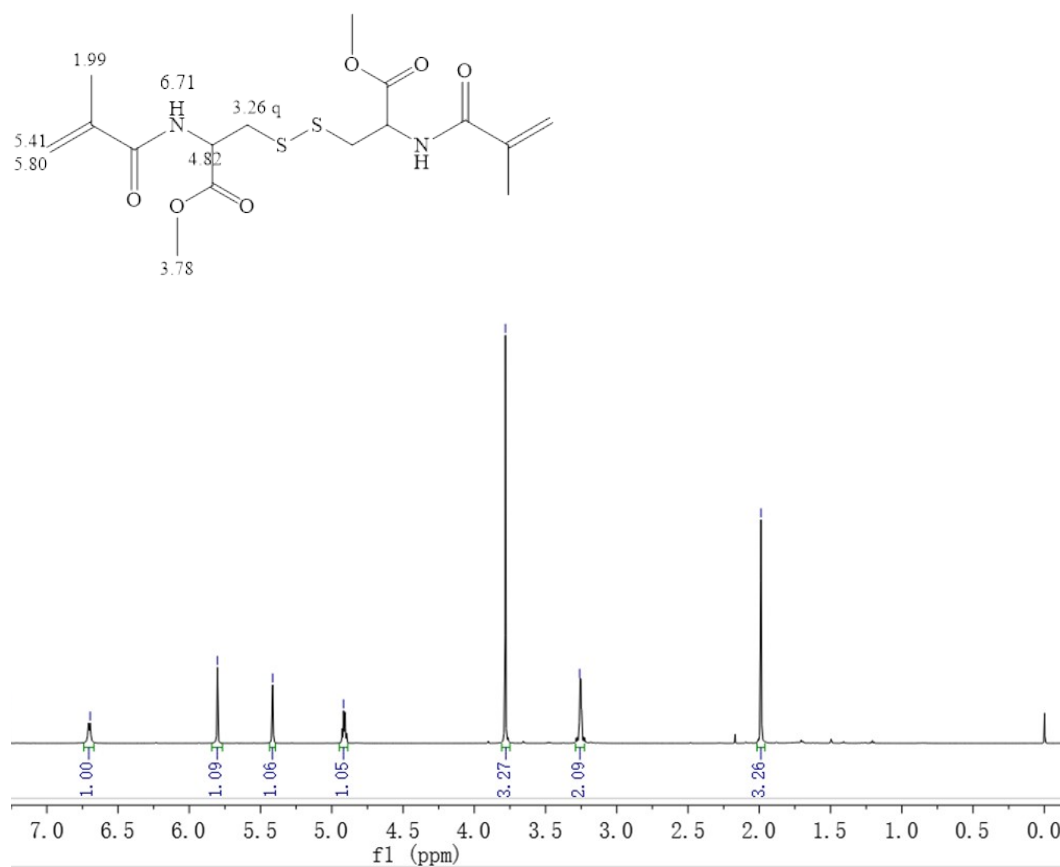

**Fig. S6** <sup>1</sup>H NMR spectrum of *N,N'*-dimethacryloylcystine dimethyl ester.

## References

1. H. Zhao, G. Jiang, J. Weng, Q. Ma, H. Zhang, Y. Ito and M. Liu, *J. Mater. Chem. B*, 2016, **4**, 4648-4651.
2. C. Su, J. Liu, Z. R. Yang, L. Jiang, X. F. Liu and W. Shao, *Int. J. Biol. Macromol.*, 2020, **161**, 1140-1148.
